# Supplementary material for: Intraspecific Relationships and Nest Mound Shape Are Affected by Habitat Features in Introduced Populations of the Red Wood Ant Formica paralugubris
Source: MDPI journal article supplement (doi:10.3390/insects13020198), 2022-02-14
Supplement: s1 [file s1]

#### A) Nest mounds

Global test:  $F_{2,27} = 13.4$ ,  $p < 0.001$

|    | Vol (l) | $\pm$ SE | Pairwise tests |     |
|----|---------|----------|----------------|-----|
|    |         |          | AA             | LC  |
| AA | 901.9   | 173.7    | -              |     |
| LC | 649.9   | 140.3    | ns             | -   |
| FF | 253.6   | 53.2     | ***            | *** |

#### B) Networks

Global test (network size):  $\chi^2 = 7.19$ ,  $p = 0.027$

Global test (volume):  $F_{2,37} = 0.764$ ,  $p = 0.473$

|    | Net size | Pairwise tests |    | Vol (l) | $\pm$ SE |
|----|----------|----------------|----|---------|----------|
|    |          | AA             | LC |         |          |
| AA | 1-9      | -              |    | 3680.2  | 1647.5   |
| LC | 1-7      | ns             | -  | 2905.9  | 967.8    |
| FF | 1-35     | *              | ns | 3481.7  | 2326.1   |

#### C) Angle of repose

Global test:  $F_{2,27} = 13.4$ ,  $p < 0.001$

|    | Ang (rad) | $\pm$ SE | Pairwise tests |    |
|----|-----------|----------|----------------|----|
|    |           |          | AA             | LC |
| AA | 0.726     | 0.03     | -              |    |
| LC | 0.656     | 0.02     | ns             | -  |
| FF | 0.542     | 0.03     | ***            | ** |

**Table S1.** A) Volumes of nest mounds, B) size and volumes of networks, and C) angle of repose for the three sites, and results of all tests performed. In “Nests per network” is reported the range of nests forming networks in that site. Pairwise tests are Tukey post-hoc tests. Sites: AA, Avornio Alto; LC, le Cullacce; FF, Fosso Fresciaio. Significance levels of pairwise tests: ns, not significant; \*,  $p < 0.05$ ; \*\*,  $p < 0.01$ ; \*\*\*,  $p < 0.001$ .
